# Supplementary material
Source: PubMed Central journal article supplement (PMC5280016)
Supplement: ASN.2016010091SupplementaryData.pdf [file ASN.2016010091SupplementaryData.pdf]

**Figure S1:** Receiver-operating characteristic curve for urinary YKL-40 for detecting acute kidney injury

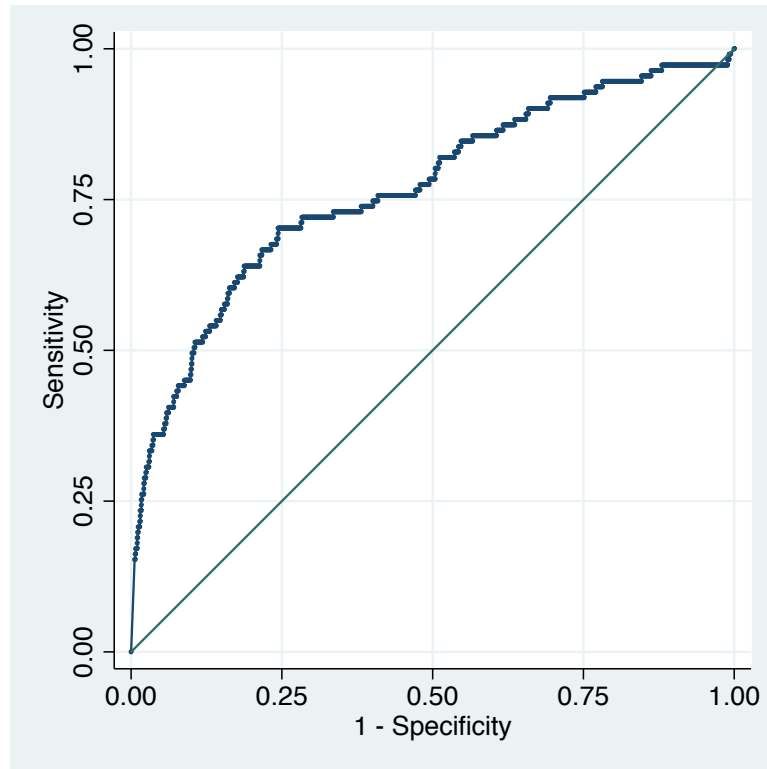

Area under the curve (AUC) for YKL-40 is 0.77 with 70.3% sensitivity and 75.6% specificity at an optimal cutoff value of 3.85 ng/mL.

**Table S1:** Donor YKL-40 concentrations, stratified by discard

| <b>Biomarker</b>       | <b>ALL<br/>(N=3108)</b> | <b>No Discard<br/>(N=2435)</b> | <b>Discard<br/>(N=673)</b> | <b>P-value</b> |
|------------------------|-------------------------|--------------------------------|----------------------------|----------------|
| Urinary YKL-40 (ng/mL) | 1.41 [0.39, 5.79]       | 1.13 [0.34, 4.46]              | 2.42 [0.71, 13.06]         | <0.001         |

**Table S2:** Association of donor YKL-40 and discard

| Tertile (Range [ng/ml]) | N                           | Rate of Discard (%) | Relative Risk (95% CI) for Discard |                       |
|-------------------------|-----------------------------|---------------------|------------------------------------|-----------------------|
|                         |                             |                     | Unadjusted                         | Adjusted <sup>1</sup> |
| T1 (<0.61)              | <i>n</i> <sub>1</sub> =1028 | 152 (15%)           | 1.0 (referent)                     | 1.0 (referent)        |
| T2 (0.61–3.31)          | <i>n</i> <sub>2</sub> =1044 | 216 (21%)           | 1.40 (1.10, 1.78)                  | 1.17 (0.96, 1.43)     |
| T3 (3.33–432.78)        | <i>n</i> <sub>3</sub> =1036 | 305 (29%)           | 1.99 (1.59, 2.49)                  | 1.28 (1.05, 1.55)     |

<sup>1</sup> Donor variables used for adjustment: age (years), height (cm), weight (kg), black race, history of hypertension, history of diabetes, terminal serum creatinine, stroke as cause of death, and donation after circulatory determination of death status.

**Table S3:** Donor YKL-40 concentrations, stratified by ATN severity

| <b>Biomarker</b>       | <b>ALL<br/>(N=1083)</b> | <b>Absent<br/>(N=810)</b> | <b>Mild<br/>(N=188)</b> | <b>Moderate / Severe<sup>1</sup><br/>(N=85)</b> | <b>P-value</b> |
|------------------------|-------------------------|---------------------------|-------------------------|-------------------------------------------------|----------------|
| Urinary YKL-40 (ng/mL) | 2.37 [0.69, 13.61]      | 2.33 [0.69, 11.44]        | 3.27 [0.68, 12.97]      | 5.35 [0.86, 33.66]                              | 0.048          |

Severity of ATN was classified as mild, moderate, or severe if the tubular involvement was reported as <25%, 25%-50%, or >50%, respectively.

<sup>1</sup>Only one biopsy was classified as severe

**Table S4:** Association of donor YKL-40 with risk of recipient DGF, stratified by trends in creatinine (Peak creatinine similar to terminal creatinine was considered <0.2 mg/dL)

| Tertile of YKL-40<br>(Range [ng/ml])                  | N                   | Rate of DGF<br>(%) | Relative Risk (95% CI) |                                              |                                                                           |                                                                                          |
|-------------------------------------------------------|---------------------|--------------------|------------------------|----------------------------------------------|---------------------------------------------------------------------------|------------------------------------------------------------------------------------------|
|                                                       |                     |                    | Unadjusted             | Adjusted for<br>donor variables <sub>1</sub> | Adjusted for<br>donor, transport<br>& recipient<br>variables <sup>2</sup> | Adjusted for<br>donor, transport,<br>recipient<br>variables & donor<br>NGAL <sup>3</sup> |
| <b>Downward Trend in Peak to Terminal Creatinine</b>  |                     |                    |                        |                                              |                                                                           |                                                                                          |
| T1 (<0.61)                                            | n <sub>1</sub> =491 | 138 (28%)          | 1.0 (referent)         | 1.0 (referent)                               | 1.0 (referent)                                                            | 1.0 (referent)                                                                           |
| T2 (0.61–3.31)                                        | n <sub>2</sub> =408 | 126 (31%)          | 1.10 (0.88, 1.38)      | 0.96 (0.78, 1.18)                            | 0.94 (0.76, 1.15)                                                         | 0.89 (0.72, 1.10)                                                                        |
| T3 (3.33–432.78)                                      | n <sub>3</sub> =315 | 95 (30%)           | 1.08 (0.85, 1.38)      | 0.91 (0.72, 1.14)                            | 0.78 (0.62, 0.99)                                                         | 0.69 (0.52, 0.91)                                                                        |
| <b>Peak Creatinine Similar to Terminal Creatinine</b> |                     |                    |                        |                                              |                                                                           |                                                                                          |
| T1 (<0.61)                                            | n <sub>1</sub> =385 | 118 (31%)          | 1.0 (referent)         | 1.0 (referent)                               | 1.0 (referent)                                                            | 1.0 (referent)                                                                           |
| T2 (0.61–3.31)                                        | n <sub>2</sub> =420 | 114 (27%)          | 0.89 (0.70, 1.13)      | 0.89 (0.71, 1.10)                            | 0.88 (0.71, 1.10)                                                         | 0.84 (0.68, 1.05)                                                                        |
| T3 (3.33–432.78)                                      | n <sub>3</sub> =416 | 165 (40%)          | 1.30 (1.05, 1.60)      | 1.01 (0.82, 1.25)                            | 1.01 (0.82, 1.25)                                                         | 0.84 (0.66, 1.09)                                                                        |

**Table S5:** Association of donor YKL-40 with 6-month eGFR, stratified DGF status (graft failure imputed as 0 ml/min/1.73m<sup>2</sup> for the 97 recipients who experienced graft failure prior to 6 months)

| Tertile of YKL-40<br>(Range [ng/ml]) | N                   | Unadjusted             | Adjusted for donor<br>variables <sup>1</sup> | Adjusted for donor,<br>transport & recipient<br>variables <sup>2</sup> | Adjusted for donor,<br>transport, recipient<br>variables & donor<br>NGAL <sup>3</sup> |
|--------------------------------------|---------------------|------------------------|----------------------------------------------|------------------------------------------------------------------------|---------------------------------------------------------------------------------------|
| <b>Recipients without DGF</b>        |                     |                        |                                              |                                                                        |                                                                                       |
| T1 (<0.61) (referent)                | n <sub>1</sub> =620 | 61.94 (59.79 to 64.09) | 54.58 (51.45 to 57.70)                       | 55.93 (53.39 to 59.47)                                                 | 55.38 (51.78 to 58.99)                                                                |
| T2 (0.61–3.31)                       | n <sub>2</sub> =588 | -2.31 (-5.26 to 0.64)  | -0.14 (-2.69 to 2.41)                        | 0.50 (-2.06 to 3.05)                                                   | 1.15 (-1.50 to 3.79)                                                                  |
| T3 (3.33–432.78)                     | n <sub>3</sub> =471 | -5.66 (-8.76 to -2.56) | -2.27 (-5.15 to 0.62)                        | -1.67 (-4.56 to 1.22)                                                  | -0.02 (-3.53 to 3.50)                                                                 |
| <b>Recipients with DGF</b>           |                     |                        |                                              |                                                                        |                                                                                       |
| T1 (<0.61) (referent)                | n <sub>1</sub> =256 | 45.11 (41.83 to 48.39) | 39.98 (35.94 to 44.03)                       | 38.67 (33.78 to 43.56)                                                 | 38.26 (33.20 to 43.32)                                                                |
| T2 (0.61–3.31)                       | n <sub>2</sub> =240 | -0.19 (-5.03 to 4.65)  | 3.00 (-1.43 to 7.43)                         | 3.18 (-1.24 to 7.61)                                                   | 3.52 (-1.04 to 8.07)                                                                  |
| T3 (3.33–432.78)                     | n <sub>3</sub> =260 | 3.73 (-0.79 to 8.25)   | 5.51 (1.14 to 9.88)                          | 6.14 (1.72 to 10.57)                                                   | 7.18 (1.53 to 12.82)                                                                  |

Values are estimated mean eGFR (95% CI) for referent tertile (T1), and estimated mean difference (95% CI) for the other tertiles (T2 and T3).

<sup>1</sup> Donor variables used for adjustment: age (years), height (cm), weight (kg), black race, history of hypertension, history of diabetes, terminal serum creatinine, stroke as cause of death, and donation after circulatory determination of death status.

<sup>2</sup> Includes all variables listed above plus the following transport and recipient variables: cold ischemia time (hours), age (years), black race, gender, previous kidney transplant, diabetes as the cause of end stage renal disease, number of human leukocyte antigen mismatches, body mass index (kg/m<sup>2</sup>), duration of dialysis before transplant (months), and panel reactive antibody (%).

<sup>3</sup> Includes all variables listed above plus log base 2-transformed donor urine NGAL.

**Table S6:** Association of donor YKL-40 with 6-month eGFR, stratified DGF status (death imputed as 0 ml/min/1.73m<sup>2</sup> for the 54 recipients who died prior to 6 months)

| Tertile of YKL-40<br>(Range [ng/ml]) | N                   | Unadjusted             | Adjusted for donor<br>variables <sup>1</sup> | Adjusted for donor,<br>transport & recipient<br>variables <sup>2</sup> | Adjusted for donor,<br>transport, recipient<br>variables & donor<br>NGAL <sup>3</sup> |
|--------------------------------------|---------------------|------------------------|----------------------------------------------|------------------------------------------------------------------------|---------------------------------------------------------------------------------------|
| <b>Recipients without DGF</b>        |                     |                        |                                              |                                                                        |                                                                                       |
| T1 (<0.61) (referent)                | n <sub>1</sub> =620 | 60.70 (58.46 to 62.95) | 53.55 (50.49 to 56.60)                       | 55.03 (51.54 to 58.53)                                                 | 54.48 (50.91 to 58.05)                                                                |
| T2 (0.61–3.31)                       | n <sub>2</sub> =588 | -1.50 (-4.53 to 1.54)  | 0.67 (-2.00 to 3.34)                         | 1.32 (-1.35 to 4.00)                                                   | 1.98 (-0.81 to 4.76)                                                                  |
| T3 (3.33–432.78)                     | n <sub>3</sub> =471 | -4.62 (-7.80 to -1.43) | -1.13 (-4.11 to 1.85)                        | -0.55 (-3.55 to 2.45)                                                  | 1.13 (-2.57 to 4.82)                                                                  |
| <b>Recipients with DGF</b>           |                     |                        |                                              |                                                                        |                                                                                       |
| T1 (<0.61) (referent)                | n <sub>1</sub> =256 | 45.64 (42.48 to 48.80) | 41.29 (37.53 to 45.05)                       | 40.60 (36.05 to 45.15)                                                 | 40.21 (35.47 to 44.94)                                                                |
| T2 (0.61–3.31)                       | n <sub>2</sub> =240 | -0.58 (-5.26 to 4.09)  | 2.41 (-1.83 to 6.65)                         | 2.82 (-1.44 to 7.08)                                                   | 3.13 (-1.26 to 7.52)                                                                  |
| T3 (3.33–432.78)                     | n <sub>3</sub> =260 | 3.79 (-0.55 to 8.12)   | 5.36 (1.18 to 9.54)                          | 6.18 (1.92 to 10.43)                                                   | 7.15 (1.67 to 12.62)                                                                  |

Values are estimated mean eGFR (95% CI) for referent tertile (T1), and estimated mean difference (95% CI) for the other tertiles (T2 and T3).

<sup>1</sup> Donor variables used for adjustment: age (years), height (cm), weight (kg), black race, history of hypertension, history of diabetes, terminal serum creatinine, stroke as cause of death, and donation after circulatory determination of death status.

<sup>2</sup> Includes all variables listed above plus the following transport and recipient variables: cold ischemia time (hours), age (years), black race, gender, previous kidney transplant, diabetes as the cause of end stage renal disease, number of human leukocyte antigen mismatches, body mass index (kg/m<sup>2</sup>), duration of dialysis before transplant (months), and panel reactive antibody (%).

<sup>3</sup> Includes all variables listed above plus log base 2-transformed donor urine NGAL.

**Table S7:** Association of donor YKL-40 with risk of recipient PNF

| Tertile of YKL-40<br>(Range [ng/ml]) | N         | Rate of PNF<br>(%) | Relative Risk (95% CI) |
|--------------------------------------|-----------|--------------------|------------------------|
|                                      |           |                    | Unadjusted             |
| T1 (<0.61)                           | $n_1=876$ | 9 (1%)             | 1.0 (referent)         |
| T2 (0.61–3.31)                       | $n_2=828$ | 11 (1%)            | 1.29 (0.49, 3.35)      |
| T3 (3.33–432.78)                     | $n_3=731$ | 13 (2%)            | 1.73 (0.71, 4.23)      |
